# Supplementary material for: Gut Microbiome Developmental Patterns in Early Life of Preterm Infants: Impacts of Feeding and Gender
Source: PubMed Central journal article supplement (PMC4844123; doi:10.1371/journal.pone.0152751), 2016-04-25

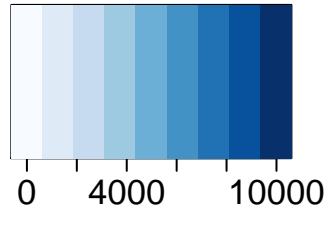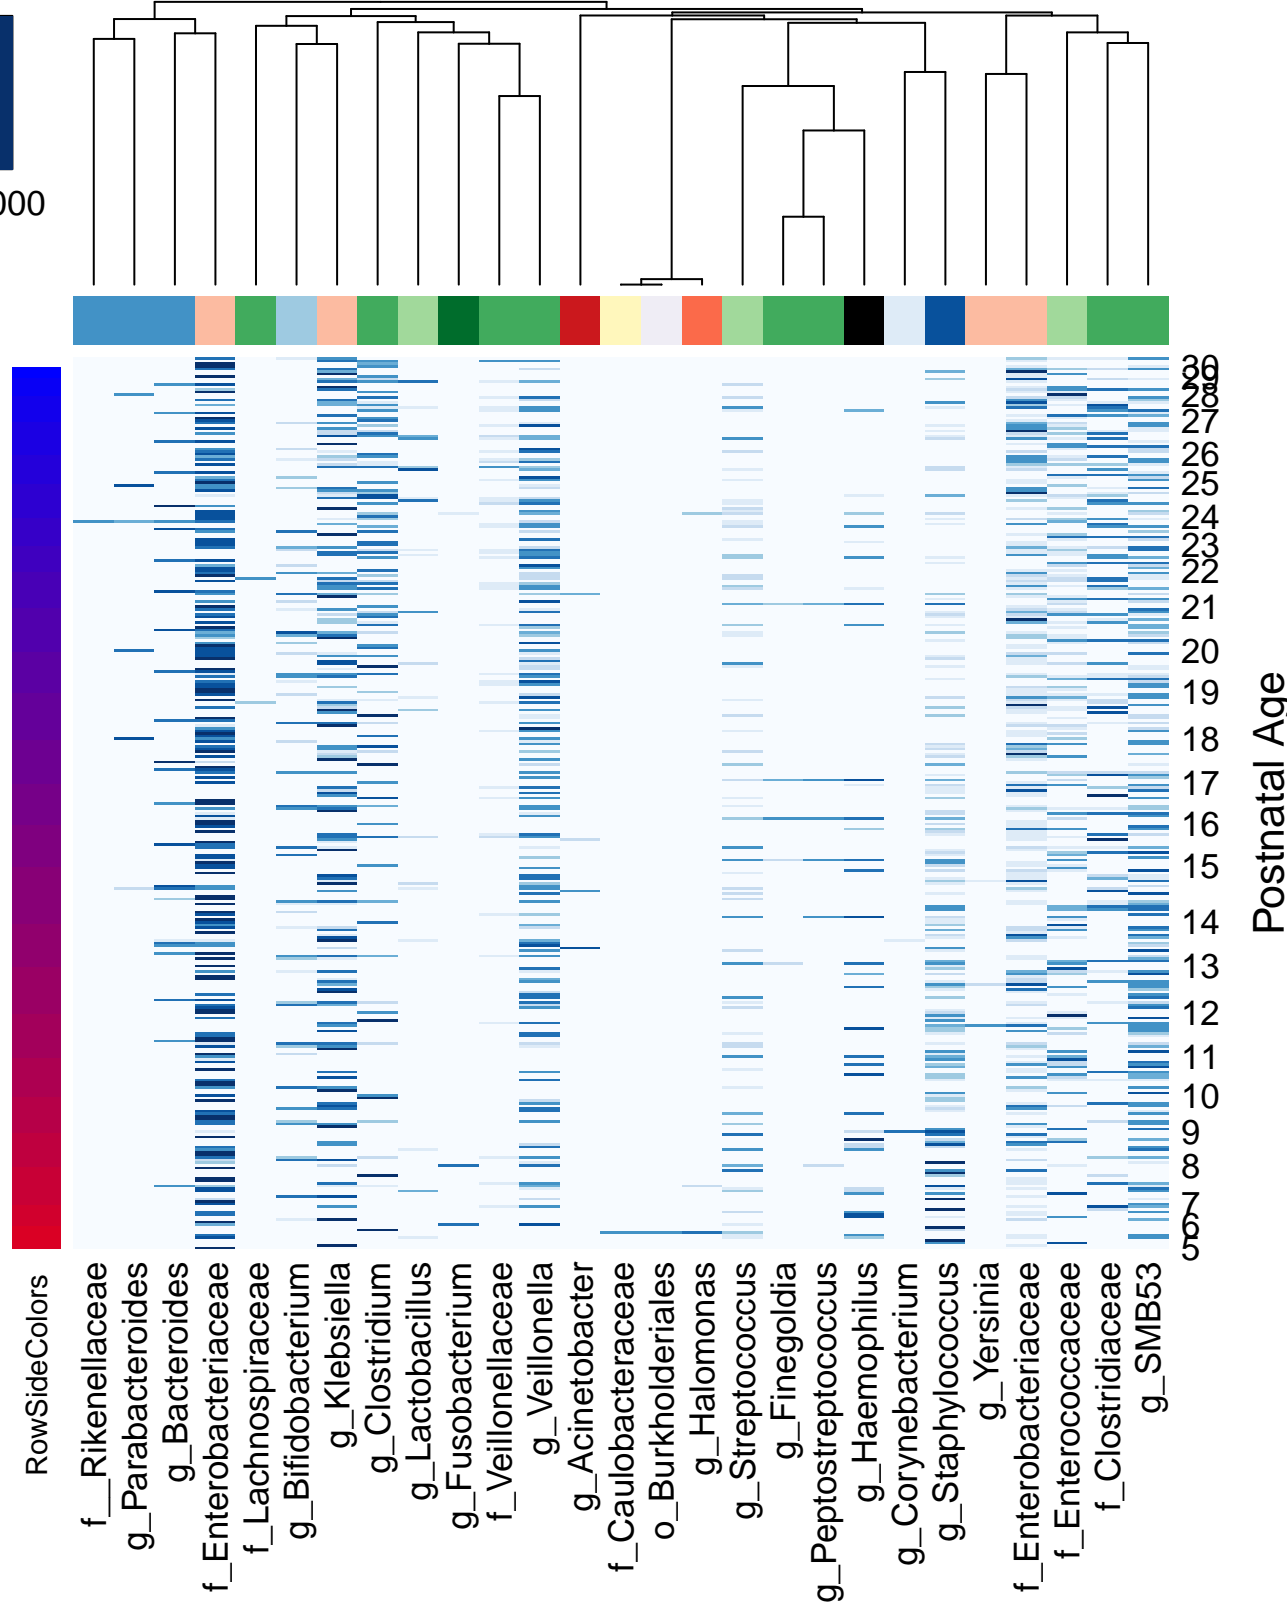

Supplement: pone.0152751.s002.pdf [file pone.0152751.s002.pdf]
